# Supplementary material for: Integrative Identification of Deregulated MiRNA/TF-Mediated Gene Regulatory Loops and Networks in Prostate Cancer
Source: PLoS One. 2014 Jun 26;9(6):e100806. doi: 10.1371/journal.pone.0100806 (PMC4072696; doi:10.1371/journal.pone.0100806)
Supplement: Table S8 — Deregulated Type II-A incoherent FFLs, predicted by IntegraMiR. (XLSX) [file pone.0100806.s010.xlsx]

## Sheet: Supplementary Table S8
Supplementary Table S8
Deregulated Type II-A incoherent FFLs, predicted by IntegraMiR.
The FFLs highlighted by yellow involve consistent deregulation.
GREEN: True-positive miRNA target prediction by the predictive
module of IntegraMiR.
BROWN: False-negative miRNA target prediction by the predictive
module of IntegraMiR.
RED: Novel miRNA target prediction by the predictive module
of IntegraMiR.
miRNA	TF	mRNA	(Fisher)
			P value
miR-221	MYC	DDX21	1.78396e-33
miR-20a	MYC	DDX21	2.99771e-33
miR-20b	MYC	DDX21	5.52612e-33
miR-17	MYC	DDX21	1.39713e-32
miR-93	MYC	DDX21	2.85875e-32
miR-106a	MYC	DDX21	4.69928e-32
miR-106b	MYC	DDX21	4.16066e-31
miR-106a	MYC	IMPDH2	1.73004e-29
miR-20a	MYC	EPRS	1.31584e-28
miR-20b	MYC	EPRS	2.42023e-28
miR-17	MYC	EPRS	6.09759e-28
miR-20a	MYC	EEF2	6.87008e-28
miR-93	MYC	EPRS	1.24423e-27
miR-20b	MYC	EEF2	1.26309e-27
miR-106a	MYC	EPRS	2.04132e-27
miR-17	MYC	EEF2	3.18024e-27
miR-93	MYC	EEF2	6.48608e-27
miR-106a	MYC	EEF2	1.06375e-26
miR-106b	MYC	EPRS	1.79141e-26
miR-221	MYC	ABL1	1.96565e-26
miR-20a	MYC	ABL1	3.29278e-26
miR-20b	MYC	ABL1	6.04758e-26
miR-20a	MYC	PPAT	8.33908e-26
miR-106b	MYC	EEF2	9.32e-26
miR-17	MYC	ABL1	1.5202e-25
miR-20b	MYC	PPAT	1.53115e-25
miR-20a	MYC	DKC1	2.4859e-25
miR-93	MYC	ABL1	3.09646e-25
miR-17	MYC	PPAT	3.8473e-25
miR-20b	MYC	DKC1	4.56292e-25
miR-106a	MYC	ABL1	5.07372e-25
miR-17	MYC	GPI	7.77142e-25
miR-93	MYC	PPAT	7.83385e-25
miR-20a	MYC	CCT3	1.01639e-24
miR-17	MYC	DKC1	1.14593e-24
miR-106a	MYC	PPAT	1.28332e-24
miR-93	MYC	PDCD11	2.28164e-24
miR-93	MYC	DKC1	2.3324e-24
miR-93	MYC	SRM	2.90185e-24
miR-106a	MYC	DKC1	3.81978e-24
miR-106b	MYC	ABL1	4.42686e-24
miR-20a	MYC	EPHA2	4.65651e-24
miR-221	MYC	E2F3	5.68209e-24
miR-20b	MYC	EPHA2	8.53908e-24
miR-20a	MYC	E2F3	9.50432e-24
miR-106b	MYC	PPAT	1.1185e-23
miR-106a	MYC	CCT3	1.55855e-23
miR-20b	MYC	E2F3	1.74247e-23
miR-200c	TP53	TP63	1.83666e-23
miR-17	MYC	EPHA2	2.14137e-23
miR-20a	MYC	ENO1	2.6184e-23
miR-106b	MYC	PDCD11	3.25258e-23
miR-106b	MYC	DKC1	3.32482e-23
miR-93	MYC	EPHA2	4.35343e-23
miR-17	MYC	E2F3	4.36799e-23
miR-20b	MYC	ENO1	4.79873e-23
miR-106a	MYC	EPHA2	7.12377e-23
miR-93	MYC	E2F3	8.87752e-23
miR-17	MYC	ENO1	1.20227e-22
miR-106a	MYC	E2F3	1.45237e-22
miR-221	MYC	SYNGR1	1.45362e-22
miR-221	MYC	PES1	1.70823e-22
miR-20a	MYC	EIF4A1	1.77345e-22
miR-20a	MYC	WDR12	2.02058e-22
miR-93	MYC	ENO1	2.44242e-22
miR-20a	MYC	SRPK1	2.71337e-22
miR-20b	MYC	EIF4A1	3.2479e-22
miR-221	MYC	MSH2	3.57375e-22
miR-20b	MYC	WDR12	3.70031e-22
miR-106a	MYC	ENO1	3.99457e-22
miR-221	MYC	CCND3	4.12083e-22
miR-221	MYC	DSC3	4.44485e-22
miR-221	MYC	HSPA8	4.54264e-22
miR-20b	MYC	SRPK1	4.96846e-22
miR-106b	MYC	EPHA2	6.17733e-22
miR-20a	MYC	CCND3	6.88369e-22
miR-20a	MYC	DSC3	7.42477e-22
miR-20a	MYC	HSPA8	7.58806e-22
miR-17	MYC	EIF4A1	8.12829e-22
miR-17	MYC	WDR12	9.25978e-22
miR-20a	MYC	EXOSC5	1.14413e-21
miR-106a	MYC	NME1	1.15175e-21
miR-17	MYC	SRPK1	1.2431e-21
miR-106b	MYC	E2F3	1.25818e-21
miR-20b	MYC	CCND3	1.26001e-21
miR-20b	MYC	DSC3	1.35901e-21
miR-20b	MYC	HSPA8	1.38888e-21
miR-221	MYC	HMGA1	1.4561e-21
miR-93	MYC	EIF4A1	1.64982e-21
miR-93	MYC	WDR12	1.87937e-21
miR-20b	MYC	EXOSC5	2.09381e-21
miR-20a	MYC	HMGA1	2.43131e-21
miR-106a	MYC	SLC25A4	2.4343e-21
miR-93	MYC	SRPK1	2.52265e-21
miR-221	MYC	FKBP4	2.60438e-21
miR-106a	MYC	EIF4A1	2.69661e-21
miR-106b	MYC	NMI	2.8267e-21
miR-200b	TP53	TP63	2.87803e-21
miR-106a	MYC	WDR12	3.07166e-21
miR-17	MYC	CCND3	3.15072e-21
miR-17	MYC	DSC3	3.39811e-21
miR-106b	MYC	ENO1	3.4555e-21
miR-17	MYC	HSPA8	3.47277e-21
miR-106a	MYC	SRPK1	4.12264e-21
miR-221	MYC	KIAA0664	4.17855e-21
miR-20b	MYC	HMGA1	4.44802e-21
miR-17	MYC	EXOSC5	5.23401e-21
miR-221	MYC	GCNT1	5.53408e-21
miR-93	MYC	CCND3	6.3909e-21
miR-93	MYC	DSC3	6.89244e-21
miR-20a	MYC	KIAA0664	6.97448e-21
miR-93	MYC	HSPA8	7.04379e-21
miR-20a	MYC	ABCE1	8.09208e-21
miR-20a	MYC	GCNT1	9.23606e-21
miR-106a	MYC	CCND3	1.04409e-20
miR-93	MYC	EXOSC5	1.06139e-20
miR-17	MYC	HMGA1	1.11135e-20
miR-106a	MYC	DSC3	1.126e-20
miR-106a	MYC	HSPA8	1.15072e-20
miR-20b	MYC	KIAA0664	1.27539e-20
miR-20b	MYC	ABCE1	1.47966e-20
miR-20b	MYC	GCNT1	1.68874e-20
miR-106a	MYC	EXOSC5	1.7337e-20
miR-20a	MYC	HLCS	2.06458e-20
miR-93	MYC	HMGA1	2.2528e-20
miR-106b	MYC	EIF4A1	2.32602e-20
miR-106b	MYC	WDR12	2.64899e-20
miR-17	MYC	KIAA0664	3.18433e-20
miR-221	MYC	HDGF	3.20287e-20
miR-106b	MYC	FASN	3.43612e-20
miR-106b	MYC	SRPK1	3.55371e-20
miR-106a	MYC	HMGA1	3.67875e-20
miR-17	MYC	ABCE1	3.69398e-20
miR-20a	MYC	PA2G4	3.7232e-20
miR-20b	MYC	HLCS	3.77355e-20
miR-221	MYC	TXNRD1	4.10577e-20
miR-17	MYC	GCNT1	4.21557e-20
miR-221	MYC	POLD1	4.52924e-20
miR-221	MYC	TP53	4.90479e-20
miR-20a	MYC	HDGF	5.34182e-20
miR-93	MYC	KIAA0664	6.45127e-20
miR-20a	MYC	TDP1	6.64637e-20
miR-20b	MYC	PA2G4	6.80324e-20
miR-93	MYC	ABCE1	7.48317e-20
miR-221	MYC	BCL11B	7.62177e-20
miR-20a	MYC	TP53	8.17894e-20
miR-93	MYC	GCNT1	8.53916e-20
miR-20a	MYC	RPIA	8.89383e-20
miR-106b	MYC	CCND3	8.9866e-20
miR-17	MYC	HLCS	9.41449e-20
miR-106b	MYC	DSC3	9.6904e-20
miR-20b	MYC	HDGF	9.75922e-20
miR-106b	MYC	HSPA8	9.90275e-20
miR-106a	MYC	KIAA0664	1.05305e-19
miR-20b	MYC	TDP1	1.21413e-19
miR-106a	MYC	ABCE1	1.22142e-19
miR-20a	MYC	BCL11B	1.27073e-19
miR-106a	MYC	GCNT1	1.39371e-19
miR-221	MYC	SERPINE1	1.40115e-19
miR-20a	MYC	VRK1	1.43872e-19
miR-106b	MYC	EXOSC5	1.49096e-19
miR-20b	MYC	TP53	1.49394e-19
miR-221	MYC	PTN	1.51603e-19
miR-20b	MYC	RPIA	1.62446e-19
miR-17	MYC	PA2G4	1.69659e-19
miR-221	MYC	KIAA0020	1.76643e-19
miR-93	MYC	HLCS	1.90616e-19
miR-200c	TP53	CAV1	1.95768e-19
miR-221	MYC	IKBKE	2.03307e-19
miR-20a	MYC	MCM4	2.13862e-19
miR-20b	MYC	BCL11B	2.32059e-19
miR-20a	MYC	SERPINE1	2.33547e-19
miR-17	MYC	HDGF	2.43311e-19
miR-20a	MYC	PTN	2.52688e-19
miR-106a	MYC	RPL6	2.58881e-19
miR-20b	MYC	VRK1	2.6272e-19
miR-20a	MYC	NCKAP1	2.63599e-19
miR-20a	MYC	CCNB1	2.7395e-19
miR-20a	MYC	CUL1	2.74514e-19
miR-20a	MYC	DUSP2	2.74586e-19
miR-17	MYC	TDP1	3.02649e-19
miR-106a	MYC	HLCS	3.11012e-19
miR-106b	MYC	HMGA1	3.15963e-19
miR-221	MYC	CCT5	3.22454e-19
miR-93	MYC	PA2G4	3.43394e-19
miR-17	MYC	TP53	3.72341e-19
miR-20a	MYC	RPS6KA2	3.78585e-19
miR-20b	MYC	MCM4	3.9045e-19
miR-17	MYC	RPIA	4.04844e-19
miR-20b	MYC	SERPINE1	4.26369e-19
miR-20b	MYC	PTN	4.61294e-19
miR-20b	MYC	NCKAP1	4.81204e-19
miR-93	MYC	HDGF	4.92361e-19
miR-20b	MYC	CCNB1	5.00088e-19
miR-20b	MYC	CUL1	5.01117e-19
miR-20b	MYC	DUSP2	5.0125e-19
miR-20a	MYC	CCT5	5.37282e-19
miR-106a	MYC	PA2G4	5.6015e-19
miR-221	MYC	ODC1	5.72866e-19
miR-221	MYC	METAP2	5.75692e-19
miR-17	MYC	BCL11B	5.78174e-19
miR-93	MYC	TDP1	6.12359e-19
miR-17	MYC	VRK1	6.54503e-19
miR-20b	MYC	RPS6KA2	6.90984e-19
miR-20a	MYC	MTHFD2	7.08183e-19
miR-221	MYC	MITF	7.14959e-19
miR-93	MYC	TP53	7.53274e-19
miR-106a	MYC	HDGF	8.03026e-19
miR-93	MYC	RPIA	8.18988e-19
miR-20a	MYC	IMPA2	8.19065e-19
miR-106b	MYC	KIAA0664	9.02775e-19
miR-17	MYC	MCM4	9.7241e-19
miR-20b	MYC	CCT5	9.80455e-19
miR-106a	MYC	TDP1	9.98647e-19
miR-106a	MYC	TXNRD1	1.02873e-18
miR-106b	MYC	ABCE1	1.04684e-18
miR-17	MYC	SERPINE1	1.06179e-18
miR-20a	MYC	TFAM	1.07801e-18
miR-20a	MYC	CSRP2	1.09318e-18
miR-17	MYC	PTN	1.1487e-18
miR-93	MYC	BCL11B	1.16938e-18
miR-106b	MYC	GCNT1	1.19421e-18
miR-17	MYC	NCKAP1	1.19823e-18
miR-93	MYC	GAMT	1.22475e-18
miR-106a	MYC	TP53	1.22834e-18
miR-17	MYC	CCNB1	1.24522e-18
miR-17	MYC	CUL1	1.24778e-18
miR-17	MYC	DUSP2	1.24811e-18
miR-221	MYC	HK2	1.25531e-18
miR-20b	MYC	MTHFD2	1.29213e-18
miR-93	MYC	VRK1	1.32365e-18
miR-106a	MYC	RPIA	1.33545e-18
miR-20a	MYC	MXI1	1.37707e-18
miR-20a	MYC	RYBP	1.62611e-18
miR-17	MYC	RPS6KA2	1.7201e-18
miR-221	MYC	EEF1A1	1.80702e-18
miR-20a	MYC	NUP155	1.87959e-18
miR-106a	MYC	BCL11B	1.90651e-18
miR-221	MYC	ACAT1	1.96397e-18
miR-93	MYC	MCM4	1.96609e-18
miR-20b	MYC	TFAM	1.96647e-18
miR-20b	MYC	CSRP2	1.99413e-18
miR-106a	MYC	GAMT	1.99674e-18
miR-20a	MYC	HK2	2.09037e-18
miR-20a	MYC	PTMA	2.11834e-18
miR-93	MYC	SERPINE1	2.14669e-18
miR-106a	MYC	VRK1	2.15791e-18
miR-93	MYC	PTN	2.32228e-18
miR-221	MYC	CXCL12	2.39377e-18
miR-93	MYC	NCKAP1	2.42236e-18
miR-17	MYC	CCT5	2.44e-18
miR-20a	MYC	CDKN2A	2.50415e-18
miR-20b	MYC	MXI1	2.51167e-18
miR-93	MYC	CCNB1	2.51729e-18
miR-93	MYC	CUL1	2.52246e-18
miR-93	MYC	DUSP2	2.52312e-18
miR-106b	MYC	HLCS	2.66097e-18
miR-221	MYC	PAX3	2.94551e-18
miR-20b	MYC	RYBP	2.96563e-18
miR-20a	MYC	EEF1A1	3.00857e-18
miR-106a	MYC	MCM4	3.2047e-18
miR-17	MYC	MTHFD2	3.21493e-18
miR-93	MYC	RPS6KA2	3.47657e-18
miR-106a	MYC	SERPINE1	3.49894e-18
miR-106a	MYC	PTN	3.78499e-18
miR-20b	MYC	HK2	3.81179e-18
miR-20b	MYC	PTMA	3.86277e-18
miR-106a	MYC	NCKAP1	3.94804e-18
miR-20a	MYC	CXCL12	3.98495e-18
miR-106a	MYC	CCNB1	4.10268e-18
miR-106a	MYC	CUL1	4.11111e-18
miR-106a	MYC	DUSP2	4.11219e-18
miR-106a	MYC	FBL	4.52157e-18
miR-20b	MYC	CDKN2A	4.56586e-18
miR-106b	MYC	PA2G4	4.78717e-18
miR-17	MYC	TFAM	4.89101e-18
miR-20a	MYC	PAX3	4.90297e-18
miR-93	MYC	CCT5	4.93047e-18
miR-17	MYC	CSRP2	4.95975e-18
miR-17	MYC	MITF	5.4023e-18
miR-20b	MYC	EEF1A1	5.48503e-18
miR-221	MYC	MAP4	5.60831e-18
miR-106a	MYC	RPS6KA2	5.66529e-18
miR-221	MYC	RPL22	6.20549e-18
miR-17	MYC	MXI1	6.24573e-18
miR-106a	MYC	ASNS	6.37132e-18
miR-93	MYC	MTHFD2	6.49517e-18
miR-106b	MYC	HDGF	6.85803e-18
miR-221	MYC	LARS	7.01404e-18
miR-20b	MYC	CXCL12	7.26394e-18
miR-17	MYC	RYBP	7.37353e-18
miR-106a	MYC	CCT5	8.0332e-18
miR-221	MYC	SARDH	8.16739e-18
miR-221	MYC	BRCA1	8.45884e-18
miR-106b	MYC	TDP1	8.525e-18
miR-20a	MYC	HSPD1	8.60581e-18
miR-221	MYC	PSPH	8.80327e-18
miR-20b	MYC	PAX3	8.93627e-18
miR-20a	MYC	MAP4	9.33243e-18
miR-17	MYC	HK2	9.47531e-18
miR-17	MYC	PTMA	9.60191e-18
miR-93	MYC	TFAM	9.8786e-18
miR-93	MYC	CSRP2	1.00173e-17
miR-20a	MYC	RPL22	1.03256e-17
miR-20a	MYC	GTF2F2	1.04558e-17
miR-106b	MYC	TP53	1.04815e-17
miR-106a	MYC	MTHFD2	1.05812e-17
miR-17	MYC	CDKN2A	1.1348e-17
miR-106b	MYC	RPIA	1.13936e-17
miR-20a	MYC	DDX5	1.1643e-17
miR-20a	MYC	LARS	1.16703e-17
miR-93	MYC	MXI1	1.26127e-17
miR-20a	MYC	PSMB1	1.33979e-17
miR-17	MYC	EEF1A1	1.36303e-17
miR-20a	MYC	BRCA1	1.40729e-17
miR-20a	MYC	PSPH	1.46457e-17
miR-93	MYC	RYBP	1.48885e-17
miR-20b	MYC	HSPD1	1.568e-17
miR-106a	MYC	TFAM	1.60899e-17
miR-106b	MYC	BCL11B	1.62538e-17
miR-106a	MYC	CSRP2	1.63157e-17
miR-20b	MYC	MAP4	1.70031e-17
miR-221	MYC	E2F2	1.71755e-17
miR-17	MYC	EEF1D	1.74193e-17
miR-106a	MYC	MITF	1.77698e-17
miR-17	MYC	CXCL12	1.80463e-17
miR-106b	MYC	VRK1	1.83925e-17
miR-20a	MYC	SNRPD3	1.86183e-17
miR-20a	MYC	NPM1	1.87908e-17
miR-20b	MYC	RPL22	1.88116e-17
miR-20b	MYC	GTF2F2	1.90485e-17
miR-93	MYC	HK2	1.9129e-17
miR-93	MYC	PTMA	1.93844e-17
miR-106a	MYC	MXI1	2.05406e-17
miR-221	MYC	IMPDH1	2.09388e-17
miR-20b	MYC	DDX5	2.12099e-17
miR-20b	MYC	LARS	2.12598e-17
miR-17	MYC	PAX3	2.21969e-17
miR-93	MYC	CDKN2A	2.29067e-17
miR-20a	MYC	THRA	2.39117e-17
miR-106a	MYC	RYBP	2.42449e-17
miR-20b	MYC	PSMB1	2.44049e-17
miR-106a	MYC	CKS2	2.49505e-17
miR-20a	MYC	ATPIF1	2.50511e-17
miR-20b	MYC	BRCA1	2.56337e-17
miR-20b	MYC	PSPH	2.66763e-17
miR-106b	MYC	MCM4	2.72922e-17
miR-93	MYC	EEF1A1	2.75101e-17
miR-20a	MYC	E2F2	2.85646e-17
miR-200b	TP53	CAV1	2.96045e-17
miR-106b	MYC	SERPINE1	2.97926e-17
miR-106a	MYC	HK2	3.11465e-17
miR-106a	MYC	PTMA	3.15621e-17
miR-106b	MYC	PTN	3.22229e-17
miR-106b	MYC	NCKAP1	3.3608e-17
miR-20b	MYC	SNRPD3	3.39074e-17
miR-20b	MYC	NPM1	3.42212e-17
miR-20a	MYC	IMPDH1	3.48196e-17
miR-106b	MYC	CCNB1	3.49215e-17
miR-106b	MYC	CUL1	3.49931e-17
miR-106b	MYC	DUSP2	3.50023e-17
miR-93	MYC	EEF1D	3.51514e-17
miR-20a	MYC	FOSL1	3.51776e-17
miR-93	MYC	CXCL12	3.64158e-17
miR-106a	MYC	CDKN2A	3.72941e-17
miR-20a	MYC	BTG1	3.74332e-17
miR-17	MYC	HSPD1	3.89277e-17
miR-17	MYC	MAP4	4.22092e-17
miR-20b	MYC	THRA	4.35408e-17
miR-221	MYC	TFRC	4.38725e-17
miR-221	MYC	EEF1B2	4.4338e-17
miR-93	MYC	PAX3	4.47845e-17
miR-106a	MYC	EEF1A1	4.47847e-17
miR-17	MYC	RPL22	4.66942e-17
miR-17	MYC	GTF2F2	4.72819e-17
miR-106b	MYC	RPS6KA2	4.81891e-17
miR-20a	MYC	ZNF239	5.07386e-17
miR-20b	MYC	E2F2	5.20075e-17
miR-17	MYC	DDX5	5.26415e-17
miR-17	MYC	LARS	5.27651e-17
miR-106a	MYC	CXCL12	5.92741e-17
miR-221	MYC	HOXB3	6.02724e-17
miR-17	MYC	PSMB1	6.05633e-17
miR-20b	MYC	IMPDH1	6.33882e-17
miR-17	MYC	BRCA1	6.36097e-17
miR-20b	MYC	FOSL1	6.40394e-17
miR-221	MYC	MNT	6.52464e-17
miR-17	MYC	PSPH	6.61943e-17
miR-221	MYC	ZNF330	6.63622e-17
miR-106a	MYC	HMOX2	6.67739e-17
miR-20b	MYC	BTG1	6.8143e-17
miR-106b	MYC	CCT5	6.82791e-17
miR-106a	MYC	PAX3	7.28881e-17
miR-20a	MYC	TFRC	7.29281e-17
miR-93	MYC	HSPD1	7.85082e-17
miR-17	MYC	SNRPD3	8.4118e-17
miR-17	MYC	NPM1	8.48959e-17
miR-93	MYC	MAP4	8.51213e-17
miR-106b	MYC	MTHFD2	8.98817e-17
miR-20b	MYC	ZNF239	9.2346e-17
miR-93	MYC	RPL22	9.41587e-17
miR-93	MYC	GTF2F2	9.5343e-17
miR-20a	MYC	VDAC1	9.5783e-17
miR-20a	MYC	SREBF1	9.58413e-17
miR-20a	MYC	E2F1	9.89421e-17
miR-20a	E2F1	MYC	9.89421e-17
miR-20a	MYC	HOXB3	1.00172e-16
miR-20a	MYC	EIF4B	1.00893e-16
miR-93	MYC	DDX5	1.06142e-16
miR-93	MYC	LARS	1.06391e-16
miR-17	MYC	THRA	1.07991e-16
miR-20a	MYC	MNT	1.08434e-16
miR-221	MYC	IREB2	1.08437e-16
miR-20a	MYC	RPL13	1.10904e-16
miR-20a	MYC	EIF4E	1.14628e-16
miR-93	MYC	PSMB1	1.22102e-16
miR-221	MYC	RPL27A	1.22492e-16
miR-106a	MYC	HSPD1	1.27737e-16
miR-93	MYC	BRCA1	1.28239e-16
miR-17	MYC	E2F2	1.28968e-16
miR-20b	MYC	TFRC	1.32701e-16
miR-93	MYC	PSPH	1.33445e-16
miR-106b	MYC	TFAM	1.36547e-16
miR-106b	MYC	CSRP2	1.3846e-16
miR-106a	MYC	MAP4	1.38491e-16
miR-221	MYC	IL1RL1	1.44288e-16
miR-106b	MYC	MITF	1.5077e-16
miR-106a	MYC	RPL22	1.53186e-16
miR-106a	MYC	GTF2F2	1.55112e-16
miR-17	MYC	IMPDH1	1.57158e-16
miR-17	MYC	FOSL1	1.58771e-16
miR-221	MYC	ITPKB	1.6426e-16
miR-17	MYC	BTG1	1.68935e-16
miR-93	MYC	SNRPD3	1.69548e-16
miR-93	MYC	NPM1	1.71115e-16
miR-221	MYC	MEST	1.71376e-16
miR-106a	MYC	DDX5	1.7267e-16
miR-106a	MYC	LARS	1.73075e-16
miR-106b	MYC	MXI1	1.74222e-16
miR-20b	MYC	VDAC1	1.74256e-16
miR-20b	MYC	SREBF1	1.74362e-16
miR-20b	MYC	E2F1	1.8e-16
miR-20a	MYC	IREB2	1.80163e-16
miR-200c	TP53	EPHA2	1.8215e-16
miR-20b	MYC	HOXB3	1.82236e-16
miR-20b	MYC	EIF4B	1.83546e-16
miR-221	MYC	ARF5	1.92222e-16
miR-221	MYC	YWHAE	1.96523e-16
miR-20b	MYC	MNT	1.97255e-16
miR-106a	MYC	PSMB1	1.98619e-16
miR-106a	MYC	RPL4	2.00517e-16
miR-20b	MYC	RPL13	2.01746e-16
miR-20a	MYC	RPL27A	2.035e-16
miR-106b	MYC	RYBP	2.05564e-16
miR-221	MYC	SLC6A1	2.07492e-16
miR-20b	MYC	EIF4E	2.08515e-16
miR-106a	MYC	BRCA1	2.08596e-16
miR-221	MYC	RAN	2.12068e-16
miR-106a	MYC	PSPH	2.1706e-16
miR-93	MYC	THRA	2.17623e-16
miR-221	MYC	GFER	2.20342e-16
miR-17	MYC	ZNF239	2.28868e-16
miR-20a	MYC	IL1RL1	2.39687e-16
miR-221	MYC	CTNNA2	2.523e-16
miR-93	MYC	E2F2	2.59859e-16
miR-106b	MYC	HK2	2.63927e-16
miR-106b	MYC	PTMA	2.67441e-16
miR-20a	MYC	ITPKB	2.72844e-16
miR-106a	MYC	SNRPD3	2.75748e-16
miR-106a	MYC	NPM1	2.78294e-16
miR-20a	MYC	MEST	2.84657e-16
miR-93	MYC	SNRPD2	2.94321e-16
miR-20a	MYC	CDT1	3.01061e-16
miR-106b	MYC	CDKN2A	3.15888e-16
miR-93	MYC	IMPDH1	3.16613e-16
miR-221	MYC	MMP16	3.17324e-16
miR-20a	MYC	ARF5	3.19262e-16
miR-93	MYC	FOSL1	3.1986e-16
miR-20b	MYC	IREB2	3.27628e-16
miR-17	MYC	TFRC	3.2876e-16
miR-93	MYC	BTG1	3.40318e-16
miR-20a	MYC	SLC6A1	3.44608e-16
miR-20a	MYC	RAN	3.52203e-16
miR-106a	MYC	THRA	3.53887e-16
miR-20a	MYC	GFER	3.65937e-16
miR-20b	MYC	RPL27A	3.70036e-16
miR-106b	MYC	EEF1A1	3.79171e-16
miR-20a	MYC	NEB	4.19562e-16
miR-106a	MYC	E2F2	4.22527e-16
miR-17	MYC	VDAC1	4.3159e-16
miR-17	MYC	SREBF1	4.31852e-16
miR-20b	MYC	IL1RL1	4.35787e-16
miR-17	MYC	E2F1	4.458e-16
miR-17	E2F1	MYC	4.458e-16
miR-17	MYC	HOXB3	4.51332e-16
miR-17	MYC	EIF4B	4.54574e-16
miR-93	MYC	ZNF239	4.60939e-16
miR-106b	MYC	EEF1D	4.84149e-16
miR-17	MYC	MNT	4.8849e-16
miR-20b	MYC	ITPKB	4.96027e-16
miR-17	MYC	RPL13	4.99599e-16
miR-106b	MYC	CXCL12	5.01512e-16
miR-106a	MYC	IMPDH1	5.1475e-16
miR-17	MYC	EIF4E	5.16344e-16
miR-20b	MYC	MEST	5.17488e-16
miR-106a	MYC	FOSL1	5.20025e-16
miR-20a	MYC	MMP16	5.26888e-16
miR-20b	MYC	CDT1	5.47287e-16
miR-106a	MYC	BTG1	5.53267e-16
miR-20b	MYC	ARF5	5.8035e-16
miR-221	MYC	FBN2	5.86806e-16
miR-20a	MYC	ATP1B3	5.925e-16
miR-106b	MYC	PAX3	6.16392e-16
miR-20b	MYC	SLC6A1	6.26391e-16
miR-20b	MYC	RAN	6.40187e-16
miR-221	MYC	HOXB5	6.47671e-16
miR-93	MYC	TFRC	6.61926e-16
miR-20b	MYC	GFER	6.65132e-16
miR-221	MYC	FGFR3	7.03962e-16
miR-106a	MYC	ZNF239	7.49234e-16
miR-20b	MYC	NEB	7.62529e-16
miR-93	MYC	CDH4	8.08792e-16
miR-17	MYC	IREB2	8.10912e-16
miR-93	MYC	VDAC1	8.68768e-16
miR-93	MYC	SREBF1	8.69296e-16
miR-93	MYC	E2F1	8.97348e-16
miR-93	MYC	HOXB3	9.08473e-16
miR-93	MYC	EIF4B	9.14994e-16
miR-17	MYC	RPL27A	9.15758e-16
miR-20b	MYC	MMP16	9.57429e-16
miR-20a	MYC	FBN2	9.73978e-16
miR-93	MYC	MNT	9.83203e-16
miR-20a	MYC	G0S2	9.84738e-16
miR-93	MYC	RPL13	1.00554e-15
miR-93	MYC	EIF4E	1.03922e-15
miR-106a	MYC	TFRC	1.0757e-15
miR-20b	MYC	ATP1B3	1.07656e-15
miR-17	MYC	IL1RL1	1.07828e-15
miR-106b	MYC	HSPD1	1.07874e-15
miR-106b	MYC	MAP4	1.16932e-15
miR-17	MYC	ITPKB	1.22716e-15
miR-17	MYC	MEST	1.2802e-15
miR-106b	MYC	RPL22	1.29308e-15
miR-106b	MYC	GTF2F2	1.30929e-15
miR-17	MYC	CDT1	1.35384e-15
miR-106a	MYC	VDAC1	1.41161e-15
miR-106a	MYC	SREBF1	1.41247e-15
miR-17	MYC	ARF5	1.43553e-15
miR-106b	MYC	DDX5	1.45711e-15
miR-106a	MYC	E2F1	1.45802e-15
miR-106b	MYC	LARS	1.46052e-15
miR-106a	MYC	HOXB3	1.47609e-15
miR-106a	MYC	EIF4B	1.48668e-15
miR-17	MYC	SLC6A1	1.54929e-15
miR-17	MYC	RAN	1.58337e-15
miR-106a	MYC	MNT	1.59743e-15
miR-93	MYC	IREB2	1.63145e-15
miR-106a	MYC	RPL13	1.63371e-15
miR-17	MYC	GFER	1.645e-15
miR-106b	MYC	PSMB1	1.67548e-15
miR-106a	MYC	EIF4E	1.68838e-15
miR-106a	MYC	RPL19	1.72136e-15
miR-106b	MYC	BRCA1	1.75943e-15
miR-20b	MYC	FBN2	1.76906e-15
miR-20b	MYC	G0S2	1.78859e-15
miR-106b	MYC	PSPH	1.83064e-15
miR-93	MYC	RPL27A	1.84219e-15
miR-17	MYC	NEB	1.88559e-15
miR-93	MYC	IL1RL1	2.16883e-15
miR-106b	MYC	SNRPD3	2.32416e-15
miR-106b	MYC	NPM1	2.34557e-15
miR-17	MYC	MMP16	2.36693e-15
miR-93	MYC	ITPKB	2.468e-15
miR-93	MYC	MEST	2.57457e-15
miR-106a	MYC	IREB2	2.64983e-15
miR-17	MYC	ATP1B3	2.6611e-15
miR-93	MYC	CDT1	2.72252e-15
miR-93	MYC	ARF5	2.88665e-15
miR-106b	MYC	THRA	2.98083e-15
miR-106a	MYC	RPL27A	2.9919e-15
miR-93	MYC	SLC6A1	3.11519e-15
miR-93	MYC	RAN	3.18366e-15
miR-93	MYC	GFER	3.30746e-15
miR-106a	MYC	IL1RL1	3.52204e-15
miR-106b	MYC	E2F2	3.55734e-15
miR-93	MYC	NEB	3.79073e-15
miR-106a	MYC	ITPKB	4.00754e-15
miR-106a	MYC	MEST	4.18047e-15
miR-106b	MYC	IMPDH1	4.33151e-15
miR-17	MYC	FBN2	4.37034e-15
miR-106b	MYC	FOSL1	4.37578e-15
miR-17	MYC	G0S2	4.41852e-15
miR-106a	MYC	CDT1	4.42056e-15
miR-106a	MYC	RPS18	4.60366e-15
miR-106b	MYC	BTG1	4.65472e-15
miR-106a	MYC	ARF5	4.68689e-15
miR-93	MYC	MMP16	4.75743e-15
miR-106a	MYC	YWHAE	4.79134e-15
miR-106a	MYC	SLC6A1	5.05769e-15
miR-106a	MYC	RAN	5.16879e-15
miR-93	MYC	ATP1B3	5.34812e-15
miR-106a	MYC	GFER	5.36966e-15
miR-106a	MYC	NEB	6.15371e-15
miR-106b	MYC	ZNF239	6.29828e-15
miR-222	ETS1	SP1	7.68625e-15
miR-106a	MYC	MMP16	7.72186e-15
miR-106a	MYC	ATP1B3	8.67996e-15
miR-93	MYC	FBN2	8.77919e-15
miR-93	MYC	G0S2	8.87589e-15
miR-106b	MYC	TFRC	9.03367e-15
miR-106b	MYC	VDAC1	1.18457e-14
miR-106b	MYC	SREBF1	1.18528e-14
miR-106b	MYC	E2F1	1.2234e-14
miR-106b	MYC	HOXB3	1.23852e-14
miR-106b	MYC	EIF4B	1.24737e-14
miR-106b	MYC	RPL13	1.37037e-14
miR-106b	MYC	EIF4E	1.4161e-14
miR-106a	MYC	FBN2	1.42438e-14
miR-106a	MYC	G0S2	1.44006e-14
miR-106a	MYC	FGFR3	1.70747e-14
miR-106a	MYC	PAEP	1.85778e-14
miR-200c	TP53	MSH2	2.16992e-14
miR-106b	MYC	IREB2	2.21963e-14
miR-106b	MYC	RPL27A	2.50527e-14
miR-200b	TP53	EPHA2	2.65427e-14
miR-106b	MYC	IL1RL1	2.94777e-14
miR-106b	MYC	ITPKB	3.35283e-14
miR-106b	MYC	MEST	3.49707e-14
miR-106b	MYC	CDT1	3.69729e-14
miR-106b	MYC	ARF5	3.91936e-14
miR-106b	MYC	SLC6A1	4.22848e-14
miR-106b	MYC	RAN	4.32108e-14
miR-106b	MYC	GFER	4.48848e-14
miR-106b	MYC	NEB	5.14175e-14
miR-106b	MYC	MMP16	6.44754e-14
miR-106b	MYC	ATP1B3	7.24491e-14
miR-106b	MYC	FBN2	1.18704e-13
miR-106b	MYC	G0S2	1.20007e-13
miR-106b	MYC	PAEP	1.5469e-13
miR-200c	TP53	CHMP4C	3.55966e-13
miR-221	MYCN	HMGA1	8.46255e-13
miR-200c	TP53	CASP1	1.11279e-12
miR-20a	MYCN	HMGA1	1.39696e-12
miR-20a	MYCN	XRCC3	3.6532e-12
miR-145	TP53	SFN	4.71151e-12
miR-17	MYCN	HMGA1	6.16189e-12
miR-221	MYCN	CRABP2	1.05559e-11
miR-20a	MYCN	CASP8	1.13872e-11
miR-17	MYCN	XRCC3	1.60676e-11
miR-106a	MYCN	HMGA1	1.97923e-11
miR-20a	MYCN	MCM7	2.43406e-11
miR-145	TP53	CASP1	3.24839e-11
miR-200c	TP53	SCN3B	4.23284e-11
miR-200b	TP53	CHMP4C	4.88422e-11
miR-17	MYCN	CASP8	4.99007e-11
miR-106a	MYCN	XRCC3	5.14822e-11
miR-145	TP53	BBC3	9.47855e-11
miR-106a	MYCN	CASP8	1.59384e-10
miR-221	MYCN	IGF1R	4.94459e-10
miR-20a	MYCN	IGF1R	8.10281e-10
miR-20a	MYCN	PTMA	1.01308e-09
miR-145	TP53	SCN3B	1.20069e-09
miR-221	MYCN	PAX3	1.39348e-09
miR-221	MYCN	NBN	1.95636e-09
miR-20a	MYCN	PAX3	2.27999e-09
miR-222	ETS1	PTHLH	2.9023e-09
miR-17	MYCN	IGF1R	3.49189e-09
miR-17	MYCN	PTMA	4.36132e-09
miR-200b	TP53	SCN3B	5.49166e-09
miR-17	MYCN	PAX3	9.77679e-09
miR-106a	MYCN	IGF1R	1.09921e-08
miR-106a	MYCN	NES	1.2712e-08
miR-17	MYCN	NBN	1.36949e-08
miR-106a	MYCN	PTMA	1.37164e-08
miR-200c	TP53	EGFR	2.08311e-08
miR-106a	MYCN	PAX3	3.06419e-08
miR-221	MYCN	ABCC1	3.51571e-08
miR-20a	MYCN	MAD2L1	3.56007e-08
miR-106a	MYCN	NBN	4.28565e-08
miR-222	ETS1	KIR3DL1	1.06784e-07
miR-20a	MYCN	SLC25A19	1.86429e-07
miR-20a	MYCN	EGFR	3.0707e-07
miR-106a	MYCN	MAD2L1	4.6451e-07
miR-145	TP53	EGFR	5.49516e-07
miR-17	MYCN	EGFR	1.27618e-06
miR-143	SMAD3	COL1A2	1.33677e-06
miR-200b	TP53	EGFR	2.41219e-06
miR-20a	NKX2-5	PLOD1	3.77141e-06
miR-106a	MYCN	EGFR	3.88946e-06
miR-17	NKX2-5	PLOD1	1.53073e-05
